# Supplementary material for: Synthesis of silica–ammonium chloride macrofibers generated by anionic surfactant templated nanotubes
Source: Royal Society of Chemistry journal article supplement (doi:10.1039/b800716k), 2008-01-01

Supplementary Material (ESI) for Journal of Materials Chemistry  
This journal is © The Royal Society of Chemistry 2008

# **Synthesis of Silica-Ammonium Chloride Macrofibers Generated by Anionic Surfactant Templated Nanotubes**

Ramon Colorado, Jr., Sarah Y. Zeigler, and Andrew R. Barron\*

*Richard E. Smalley Institute for Nanoscale Science and Technology  
and Department of Chemistry, Rice University, Houston, Texas 77005, USA*

Supplementary Material

**Fig. S1.** Digital photograph of the gel precipitate (top) before and (bottom) after drying.

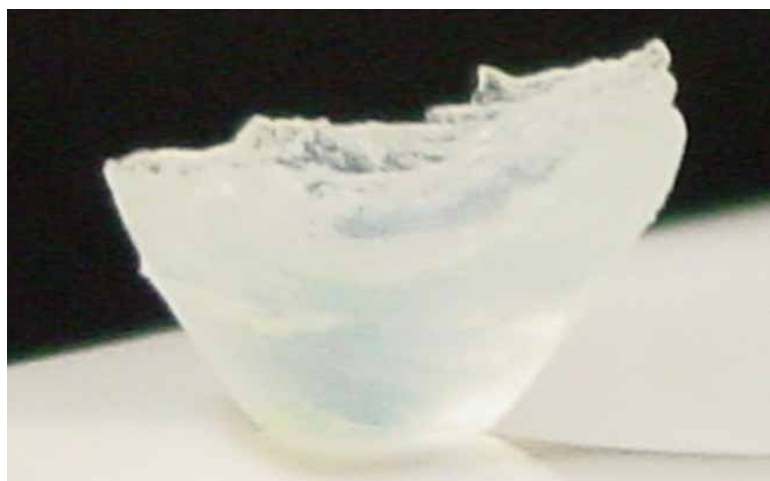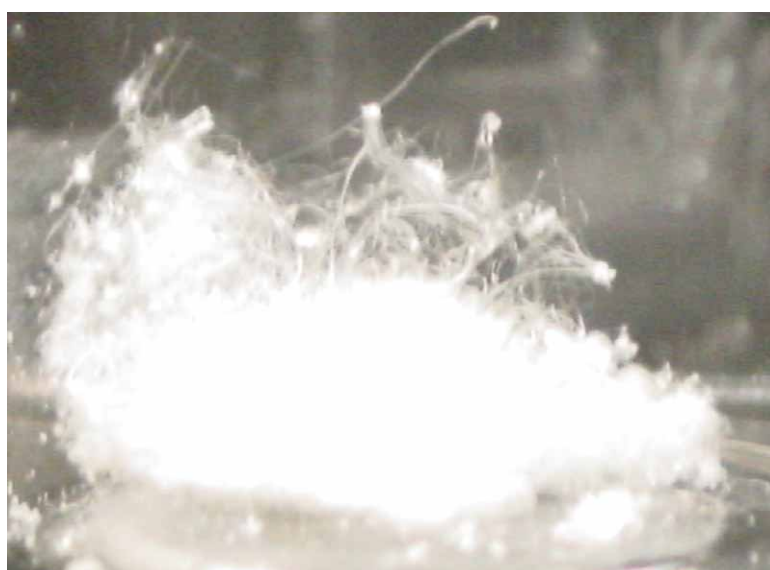

**Fig. S2.** SEM image showing silica hairs.

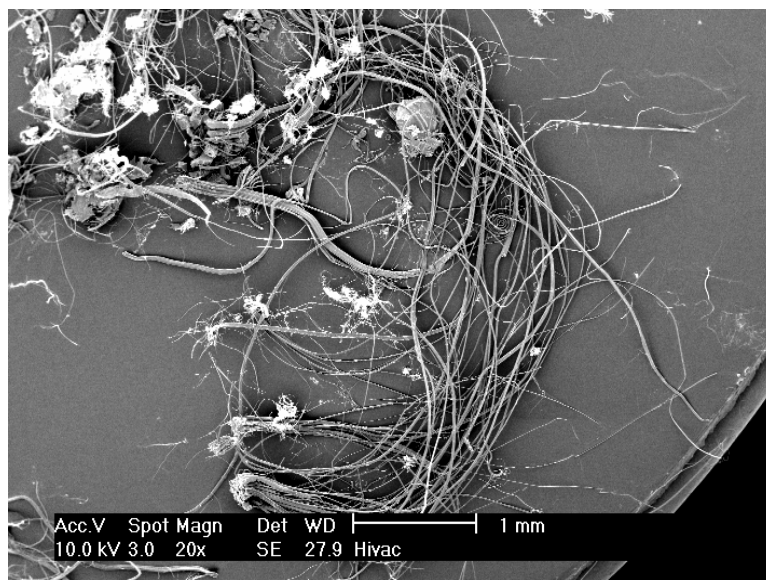

**Fig. S3.** SEM images showing a magnification of two thicker silica nanotubes of differing thickness showing the particulate structure of the tubes.

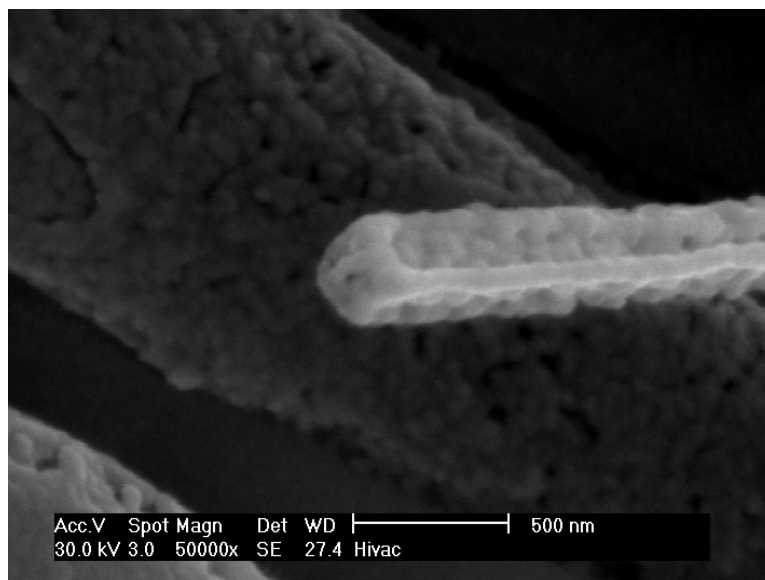

**Fig. S4.** TEM images showing silica-ammonium chloride belts revealing the hollow core of the nanotube templates.

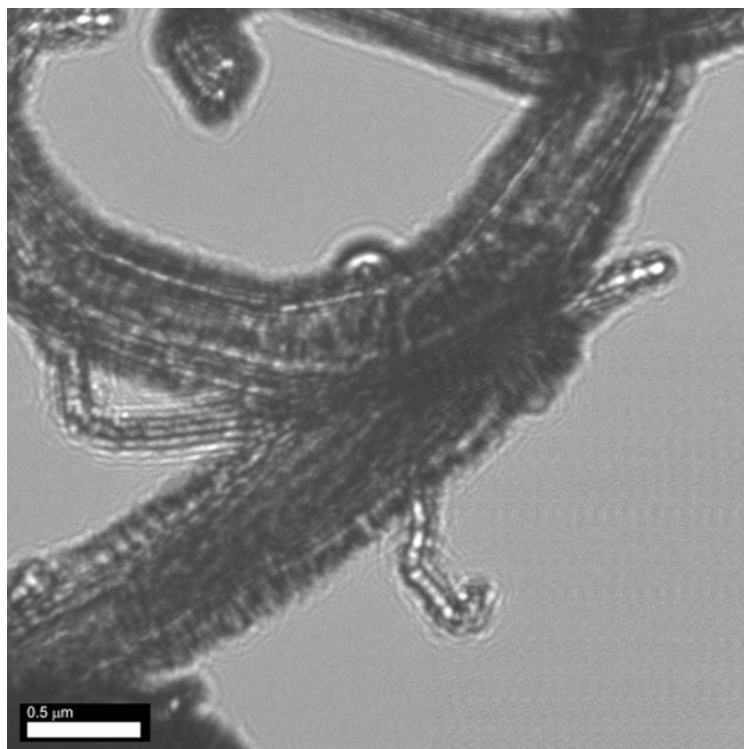

**Fig. S5.** X-ray photoelectron spectra of silica-ammonium chloride macrofibers including (a) Si2p, (b) O1s, (c) N1s, and (d) Cl2p.

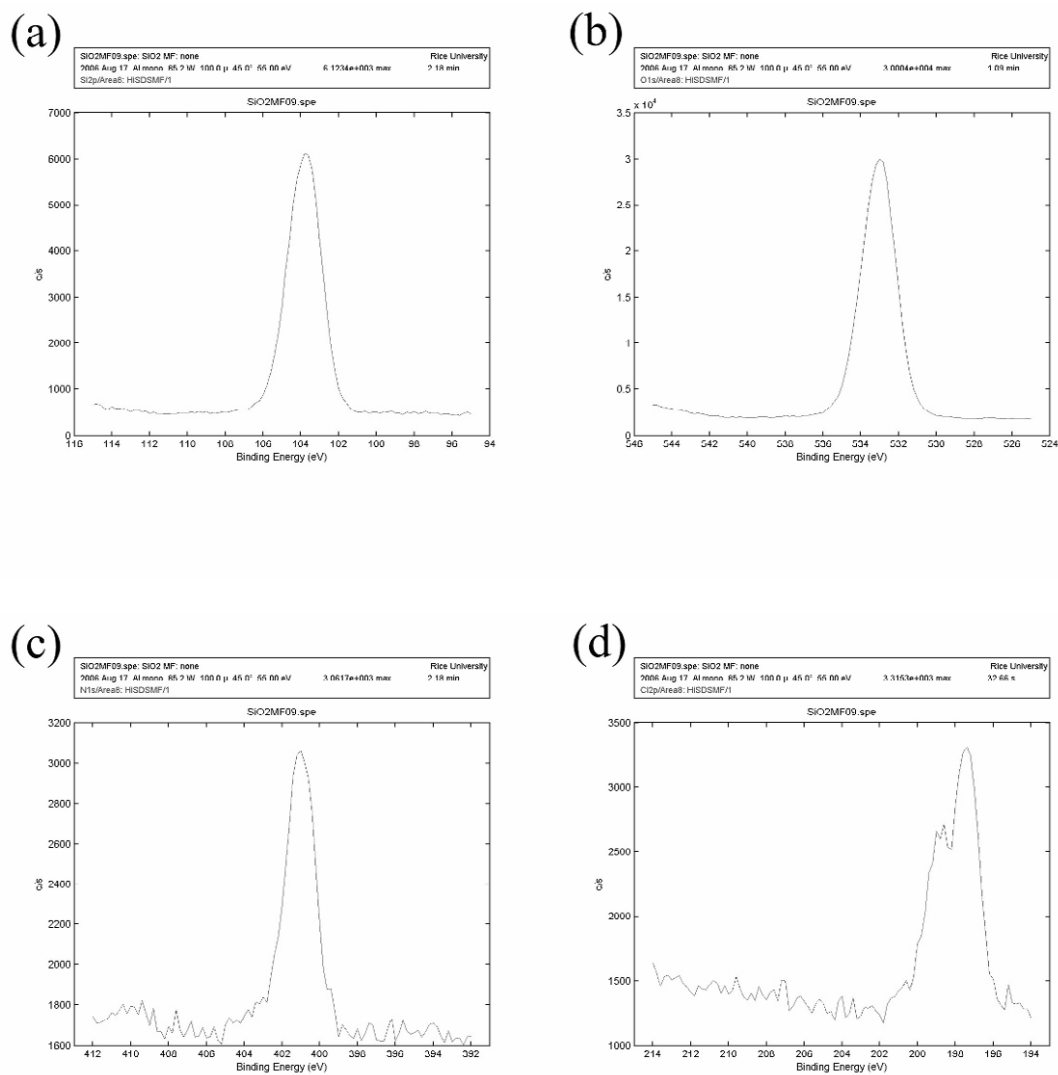

Supplement: b800716k.pdf [file b800716k.pdf]
